## RESEARCH ARTICLE

# Energy metabolism and regeneration are impaired by seawater acidification in the infaunal brittlestar *Amphiura filiformis*

Marian Y. Hu<sup>1,2,\*</sup>, Isabel Casties<sup>1</sup>, Meike Stumpp<sup>1,2</sup>, Olga Ortega-Martinez<sup>1</sup> and Sam Dupont<sup>1</sup>

## ABSTRACT

Seawater acidification due to anthropogenic release of CO<sub>2</sub> as well as the potential leakage of pure CO<sub>2</sub> from sub-seabed carbon capture storage (CCS) sites may impose a serious threat to marine organisms. Although infaunal organisms can be expected to be particularly impacted by decreases in seawater pH, as a result of naturally acidified conditions in benthic habitats, information regarding physiological and behavioral responses is still scarce. Determination of  $P_{O_2}$  and  $P_{CO_2}$  gradients within burrows of the brittlestar *Amphiura filiformis* during environmental hypercapnia demonstrated that besides hypoxic conditions, increases of environmental  $P_{CO_2}$  are additive to the already high  $P_{CO_2}$  (up to 0.08 kPa) within the burrows. In response to up to 4 weeks exposure to pH 7.3 (0.3 kPa  $P_{CO_2}$ ) and pH 7.0 (0.6 kPa  $P_{CO_2}$ ), metabolic rates of *A. filiformis* were significantly reduced in pH 7.0 treatments, accompanied by increased ammonium excretion rates. Gene expression analyses demonstrated significant reductions of acid–base (*NBCe* and *AQP9*) and metabolic (*G6PDH*, *LDH*) genes. Determination of extracellular acid–base status indicated an uncompensated acidosis in CO<sub>2</sub>-treated animals, which could explain the depressed metabolic rates. Metabolic depression is associated with a retraction of filter feeding arms into sediment burrows. Regeneration of lost arm tissues following traumatic amputation is associated with significant increases in metabolic rate, and hypercapnic conditions (pH 7.0, 0.6 kPa) dramatically reduce the metabolic scope for regeneration, reflected in an 80% reduction in regeneration rate. Thus, the present work demonstrates that elevated seawater  $P_{CO_2}$  significantly affects the environment and the physiology of infaunal organisms like *A. filiformis*.

**KEY WORDS:** Acid–base regulation, Carbon capture storage, Behavior, Hypercapnia, Ocean acidification, Invertebrates

## INTRODUCTION

The effects of elevated seawater  $P_{CO_2}$  (hypercapnia) on marine organisms have moved into the research focus because of rising atmospheric CO<sub>2</sub> concentrations that have led to a drop in ocean average surface pH by 0.1 units since industrialization and are expected to cause a further decline by 0.3 to 0.5 pH units till the end of the century, a phenomenon known as ocean acidification (Caldeira and Wickett, 2003; Dupont and Pörtner, 2013). In this context, carbon capture storage (CCS) has been discussed as a potent technique to remove CO<sub>2</sub> from the atmosphere to be stored in sub-seabed sediments (Haugen and Eide, 1996). For example, the

Skagerrak and Kattegat region is debated as a suitable area for CCS (Haugen et al., 2011). However, the potential risks of seepage of pure CO<sub>2</sub> may represent an enormous local challenge to benthic and infaunal organisms as a result of strong local pH fluctuations (IPCC, 2005).

Water-breathing animals exchange CO<sub>2</sub> across epithelia by maintaining a diffusion gradient with ~0.2–0.4 kPa higher  $P_{CO_2}$  values in tissues compared with the surrounding water (Evans et al., 2005; Melzner et al., 2009). In order to maintain this diffusion gradient, the increase of seawater  $P_{CO_2}$  will result in an increase of  $P_{CO_2}$  in body tissues and fluids. Such hypercapnic conditions can cause an extracellular acidosis if not actively compensated by H<sup>+</sup> secretion or/and HCO<sub>3</sub><sup>−</sup> accumulation in body fluids (Heisler, 1989). Earlier studies using *Sipunculus nudus* as a marine model organism demonstrated that an uncompensated extracellular acidosis can trigger metabolic depression (Reipschläger and Pörtner, 1996; Reipschläger et al., 1997; Pörtner et al., 1998). CO<sub>2</sub>-induced acid–base disturbances have been demonstrated to alter the physiology and developmental features of marine invertebrates (Thomsen and Melzner, 2010; Hu et al., 2011; Stumpp et al., 2011b; Stumpp et al., 2012). For example, echinoderms, crustaceans and mollusks have been shown to alter growth/developmental rates, oxygen consumption and gene expression in response to hypercapnia (Kurihara et al., 2007; Dupont et al., 2010; Lannig et al., 2010; Walther et al., 2010; Hu et al., 2011; Stumpp et al., 2011a; Stumpp et al., 2011b; Stumpp et al., 2012; Dupont and Thorndyke, 2014). Because of the very low  $P_{O_2}$  partial pressures (Vopel et al., 2003) in burrows that are very likely accompanied by high  $P_{CO_2}$  and low pH, burrowing species are already experiencing higher acidification compared with other benthic species. Additionally, benthic habitats are often confronted with strong fluctuations in  $P_{O_2}$  and  $P_{CO_2}$ , leading to naturally acidified conditions, which will be amplified by ocean acidification (Melzner et al., 2012). It can be expected that increases in seawater  $P_{CO_2}$  will strongly affect CO<sub>2</sub> and pH gradients within sediment burrows, leading to strong acid–base challenges to infaunal organisms.

The infaunal brittlestar *Amphiura filiformis* (O. F. Müller 1776) is an important species in many polar and temperate marine benthic habitats, with densities of up to 3500 individuals per square meter (Rosenberg et al., 1997). *Amphiura filiformis* lives in semi-permanent sediment burrows and feeds on particulate organic matter (POM) by extending two to three arms into the water column (Loo et al., 1996). This species is an important prey for many predators like crustaceans and fish, leading to sublethal injury (e.g. loss of exposed arms) (Duineveld and Van Noort, 1986). As arms are essential organs for suspension feeding (Woodley, 1975), respiration (Ockelmann, 1978) and ventilation of the burrow (Nilsson, 1999), long-term selection pressure on *A. filiformis* has led to the ability to autotomize their arms in case of an attack by a predator, and to a high potential for regeneration of these lost tissues (Dupont and Thorndyke, 2006). The process itself and the physiological

<sup>1</sup>Department of Biological and Environmental Sciences, The Sven Lovén Centre for Marine Sciences, Kristineberg, University of Gothenburg, 45178 Fiskebäckskil, Sweden. <sup>2</sup>Institute of Cellular and Organismic Biology, Academia Sinica, Taipei 115, Taiwan.

\*Author for correspondence (marian.yongan.hu@gmail.com)

| List of abbreviations |                            |
|-----------------------|----------------------------|
| ADM                   | ash dry mass               |
| AFDM                  | ash-free dry mass          |
| CCS                   | carbon capture storage     |
| DM                    | dry mass                   |
| FM                    | fresh mass                 |
| pH <sub>e</sub>       | external pH                |
| POM                   | particulate organic matter |
| RMR                   | routine metabolic rate     |

properties of regeneration were investigated in earlier studies, suggesting that energetic costs for the regeneration of arms are significant (Fielman et al., 1991; Pomory and Lawrence, 1999). Moreover, depending on the position of autotomy, the available energy can be used for either growth or differentiation of the regenerating arm piece (Dupont and Thorndyke, 2006). Previous studies demonstrated differential responses of regeneration rates in brittlestars exposed to seawater acidification (Wood et al., 2008; Wood et al., 2011). The arctic brittlestar *Ophiocten sericeum* decreased regeneration rates under acidified conditions whereas *A. filiformis* increased regeneration rates under acidified conditions of pH 7.3. However, in both species, reduced seawater pH led to an increase in metabolic rates, which has been hypothesized to support increased energetic demands to maintain calcification.

The present work aimed at investigating whether elevated seawater  $P_{CO_2}$  levels, relevant for ocean acidification and potential  $CO_2$  seepage from CCS sites, may impact energy metabolism and regeneration capacities of the infaunal brittlestar *A. filiformis*. To test how changes in seawater  $P_{CO_2}$  affect the micro-environment surrounding *A. filiformis*, we determined abiotic factors (e.g.  $P_{O_2}$ , pH and  $P_{CO_2}$ ) within their burrows. This information is crucial in order to estimate the actual  $P_{CO_2}$  levels experienced by the animal, and helps to explain how elevated seawater  $P_{CO_2}$  could affect the physiology of infaunal organisms. Furthermore, it can be assumed that under control conditions *A. filiformis* already experience increased hypercapnic and hypoxic conditions within their burrows due to respiration and metabolic release of  $CO_2$ . This would probably lead to an additive effect of increased seawater  $P_{CO_2}$  to the naturally increased  $P_{CO_2}$  levels within burrows. We hypothesized that decreased seawater pH imposes a significant challenge to the energy metabolism of these animals as a result of low acid–base regulatory abilities. According to earlier studies conducted on other invertebrate species (Reipschläger and Pörtner, 1996; Michaelidis et al., 2007; Thomsen and Melzner, 2010; Stumpp et al., 2012), we expected that *A. filiformis* may tolerate moderate acidification but aerobic metabolism cannot support energetic demands during severe

acidification over longer periods, leading to the onset of metabolic depression. This may particularly affect the regeneration process as it is believed to be associated with high energetic costs.

RESULTS

CO<sub>2</sub> perturbation experiments

In order to investigate the effects of seawater acidification on physiology, behavior and abiotic parameters inside sediment burrows, we performed four pH perturbation experiments (Table 1). The first experiment (experiment 1), addressing the effects of acidification on metabolic rates,  $NH_4^+$  excretion, gene expression and composition of body parts, used seawater pH values of 8.0, 7.3 and 7.0 corresponding to  $P_{CO_2}$  levels of 526, 3396 and 6644  $\mu atm$  in the seawater above the sediment. pH in the benthic layer of the Gullmarsfjord was estimated using data from SMHI Database Svenskt Havrarkiv (from March to September 1959–1987) and varies between 7.8 in autumn and winter and 8.1 in spring. To address the extracellular acid–base status of *A. filiformis* exposed to different pH conditions (experiment 2), we used pH values of 8.0, 7.6 and 7.3 corresponding to  $P_{CO_2}$  levels of 492, 1473 and 3213  $\mu atm$ . The pH levels used in these two experiments simulate potential scenarios in the context of ocean acidification in benthic habitats (e.g. pH 8.0, 7.6 and 7.3) as well as a more extreme pH level of 7.0, which simulates acidification by leakage of pure  $CO_2$  from sub-seabed CCS sites. To investigate the effects of acidification on abiotic conditions inside the sediment burrow micro-habitat (experiment 3) and regeneration capacity (experiment 4), we performed two additional experiments using the lower pH level of 7.0, which corresponded to a  $P_{CO_2}$  of 6400  $\mu atm$ .

Abiotic parameters within burrows (experiment 1)

$O_2$  and  $CO_2$  profiles determined for *A. filiformis* burrows demonstrate a progressive decrease of  $P_{O_2}$  and an increase of  $P_{CO_2}$  with depth (Fig. 1A,B).  $O_2$  levels decreased down to  $50.11 \pm 7.3 \text{ mmol l}^{-1}$  (20% air saturation) and  $CO_2$  levels increased to  $0.13 \pm 0.009 \text{ kPa}$  (pH  $7.64 \pm 0.03$ ) at a depth of 3 cm (Fig. 1A,B). No pH-induced differences in  $O_2$  profiles were recorded in the sediment (Fig. 1C). During environmental acidification (pH 7), burrow water pH decreased to  $6.98 \pm 0.02$  ( $P_{CO_2}$   $0.65 \pm 0.05 \text{ kPa}$ ) (Fig. 1A). Total alkalinity measured from burrow water (3 cm depth) was  $2.17 \pm 0.26$  under control and  $2.17 \pm 0.48$  under low pH conditions. Decreased seawater pH induced by hypercapnic conditions led to increases in burrow water  $P_{CO_2}$  in an additive fashion. However, independent of the degree of seawater acidification (hypercapnic conditions), we observed a constant  $P_{CO_2}$  gradient of  $\sim 0.05 \text{ kPa}$  between burrow water at 3 cm depth and the surrounding seawater.

Table 1. Seawater physiochemical conditions of the four different hypercapnia experiments

|              | Measured  |                  |            |                   | Calculated               |                     |
|--------------|-----------|------------------|------------|-------------------|--------------------------|---------------------|
|              | pH        | Temperature (°C) | Salinity   | Alkalinity (mmol) | $P_{CO_2}$ ( $\mu atm$ ) | Total $CO_2$ (mmol) |
| Experiment 1 | 7.93±0.02 | 8.70±0.27        | 31.20±0.10 | 2.18±0.03         | 695.78±39.81             | 2.09±0.03           |
|              | 7.03±0.03 | 8.60±0.22        | 31.16±0.09 | 2.18±0.03         | 6347.76±556.30           | 2.44±0.04           |
| Experiment 2 | 8.06±0.05 | 10.23±0.90       | 31.19±0.07 | 2.22±0.02         | 526.34±19.01             | 2.10±0.02           |
|              | 7.29±0.04 | 10.17±0.95       | 31.22±0.06 | 2.23±0.04         | 3395.83±236.59           | 2.36±0.05           |
|              | 7.30±0.04 | 10.25±0.86       | 31.17±0.06 | 2.20±0.03         | 6643.84±185.20           | 2.49±0.02           |
| Experiment 3 | 8.04±0.08 | 8.47±0.14        | 31.57±0.17 | 2.25±0.04         | 492.46±78.79             | 2.13±0.05           |
|              | 7.63±0.07 | 8.42±0.16        | 31.46±0.15 | 2.27±0.02         | 1473.40±241.60           | 2.28±0.02           |
|              | 7.30±0.03 | 8.42±0.18        | 31.64±0.08 | 2.29±0.02         | 3213.10±218.46           | 2.40±0.02           |
| Experiment 4 | 7.99±0.08 | 11.10±0.14       | 31.55±0.35 | 2.20±0.04         | 614.60±126.43            | 2.09±0.01           |
|              | 7.01±0.01 | 11.05±0.07       | 31.65±0.49 | 2.19±0.01         | 6399.70±252.10           | 2.46±0.03           |

pH is measured on the NBS scale.

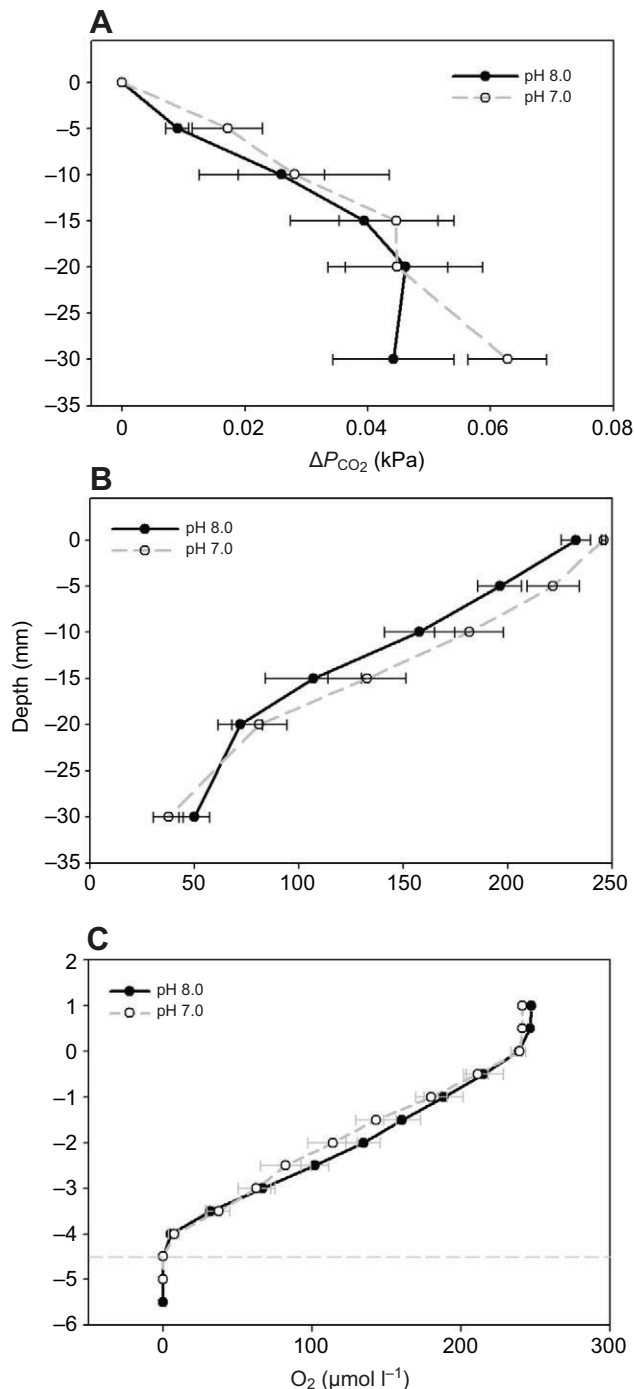

**Fig. 1. Abiotic parameters in *Amphiura filiformis* burrows.** (A)  $P_{CO_2}$  profiles ( $\Delta P_{CO_2}$  relative to  $P_{CO_2}$  at 0 mm depth) in burrows of *A. filiformis*.  $CO_2$  concentrations were calculated from total alkalinity and pH measured in different depth and pH treatments. Values are given as means  $\pm$  s.e.m. ( $N=4$ ). (B,C) Oxygen profiles in burrows of *A. filiformis* (B) and in the sediment surface (C). Oxygen concentrations were measured in different depth and  $CO_2$  treatments. Values are given as means  $\pm$  s.e.m. ( $N=4$ ).

#### Routine metabolic rate, ammonium excretion and O:N ratio (experiment 2)

Routine metabolic rate (RMR) was significantly influenced by decreased pH over the time course of 4 weeks (Fig. 2A), with a significant decrease at pH 7.0 down to  $0.66 \pm 0.06 \mu\text{mol O}_2 \text{ g}_{\text{FM}}^{-1} \text{ h}^{-1}$  (where  $\text{g}_{\text{FM}}$  is grams of fresh mass) compared with  $0.95 \pm 0.06$  to

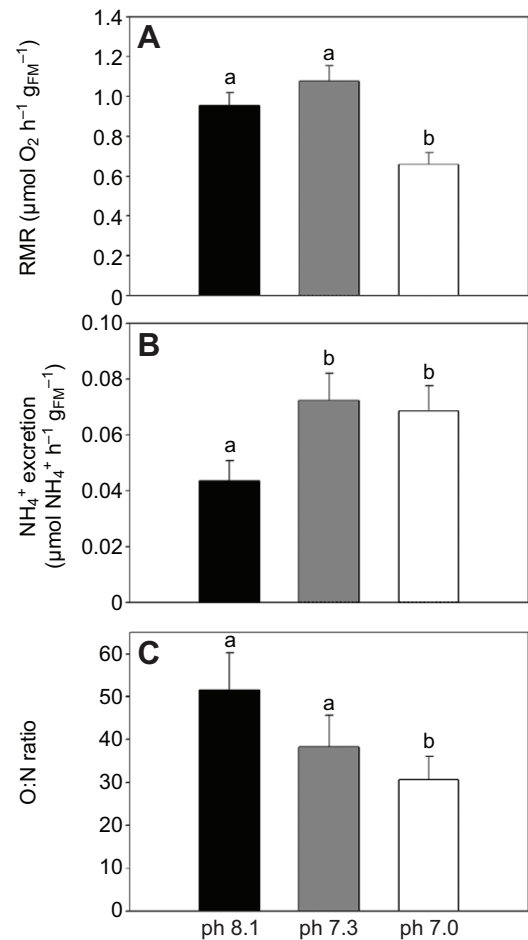

**Fig. 2. Effects of seawater acidification on metabolism and  $NH_4^+$  excretion.** (A) Routine metabolic rate (RMR) and (B)  $NH_4^+$  excretion rate in *A. filiformis* exposed to three pH levels over a period of 4 weeks.  $\text{g}_{\text{FM}}$ , g fresh mass. (C) O:N ratio. Values are given as means  $\pm$  s.e.m. Significant differences between treatments are indicated by different letters (one-way ANOVA,  $P < 0.05$ ,  $N=4$ ).

$1.07 \pm 0.07 \mu\text{mol O}_2 \text{ g}_{\text{FM}}^{-1} \text{ h}^{-1}$  at pH 8.1 and pH 7.3, respectively. Ammonium excretion rates significantly increased with increasing  $P_{CO_2}$  from  $0.044 \pm 0.007 \mu\text{mol NH}_4^+ \text{ g}_{\text{FM}}^{-1} \text{ h}^{-1}$  under pH 8.1 conditions to  $0.0723 \pm 0.01 \mu\text{mol NH}_4^+ \text{ g}_{\text{FM}}^{-1} \text{ h}^{-1}$  and  $0.069 \pm 0.009 \mu\text{mol NH}_4^+ \text{ g}_{\text{FM}}^{-1} \text{ h}^{-1}$  at pH 7.3 and 7.0, respectively (Fig. 2B). Accordingly, the O:N ratio decreased significantly with decreasing pH from  $51.57 \pm 8.59$  at pH 8.1 down to  $30.56 \pm 5.46$  at pH 7.0 (Fig. 2C). We did not observe any mortality during the entire experimental period.

#### Gene expression (experiment 2)

In disc tissues of animals maintained for 4 weeks at pH 7.3 or pH 7.0 (Fig. 3A) the only significant change in gene expression was observed for the NHE3 regulator *NHE3reg*, which was  $0.36 \pm 0.09 \log_2$ -fold (22%) upregulated in response to pH 7.3. No significant differences were observed for any other genes.

In arm tissues (Fig. 3B) several significant changes were observed: among the ion-regulatory genes, *NBCe* and *AQP9* were  $1.0 \pm 0.46$  and  $1.72 \pm 0.95 \log_2$ -fold downregulated in pH 7.0 treatment. Among the metabolic genes, *G6PDH* transcript abundance was significantly affected in both treatments, by  $0.96 \pm 0.37$  and  $1.61 \pm 0.55 \log_2$ -fold at pH 7.3 and 7.0, respectively. *LDH* expression was significantly reduced by  $0.52 \pm 0.24 \log_2$ -fold

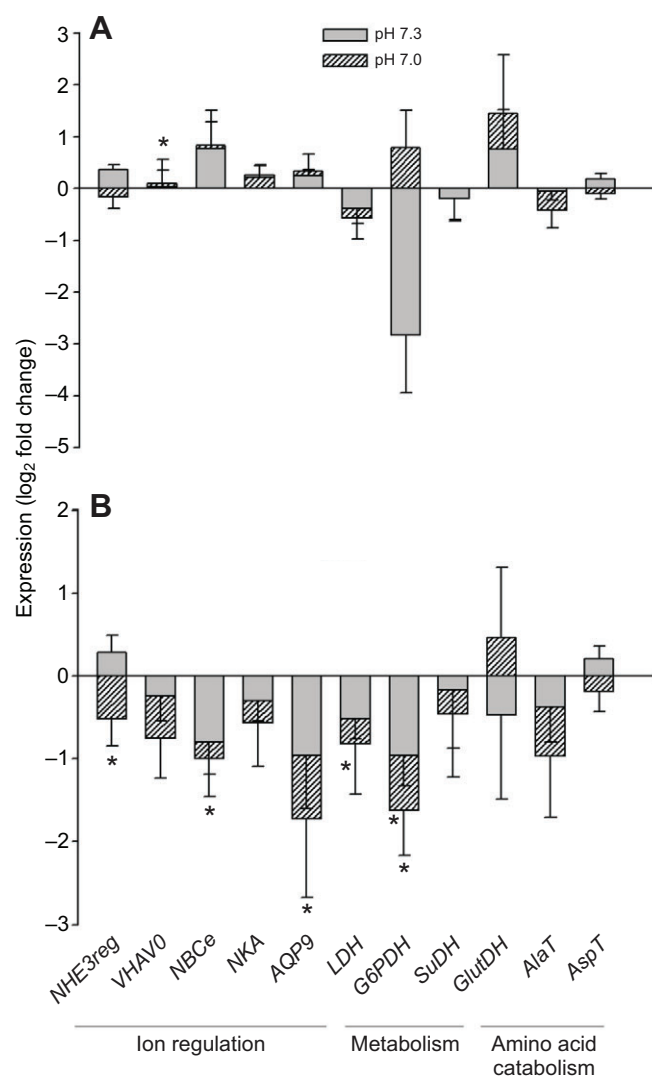

**Fig. 3. Gene expression profiles in disc and arm tissues.** Expression profiles for selected genes determined for disc (A) and arm (B) tissues of *A. filiformis* after exposure to three different pH levels (pH 8.1, 7.3 and 7.0) for 4 weeks. Expression of the candidate genes was normalized to ubiquitin-conjugated enzyme (*UCE*) gene expression. Asterisks denote a significant change (one-way ANOVA,  $P < 0.05$ ) in gene expression ( $N = 4$ ).

at pH 7.3. No significant changes were detected between the different pH treatments for genes involved in amino acid catabolism including amino acid-specific trans-aminases.

### Biometrics and behavior (experiment 2)

Along the experimental period no significant changes were detected in fresh mass (FM), dry mass (DM), ash-free dry mass (AFDM) and the ratio between ash dry mass (ADM) and DM for arms and bodies, respectively (supplementary material Tables S1 and S2). However, a significant decrease of visible actively filter-feeding arms was observed in decreased pH, with only 43% of visible arms in pH 7.3 and 27% in pH 7.0 seawater (Fig. 4), whereas animals in pH 8.1 exposed up to 73% of their arms into the water column.

### Extracellular acid-base status (experiment 3)

In order to test how far *A. filiformis* are able to control their extracellular pH homeostasis, we used pH-sensitive optodes to measure extracellular pH ( $pH_e$ ) in the coelomic cavity of control and

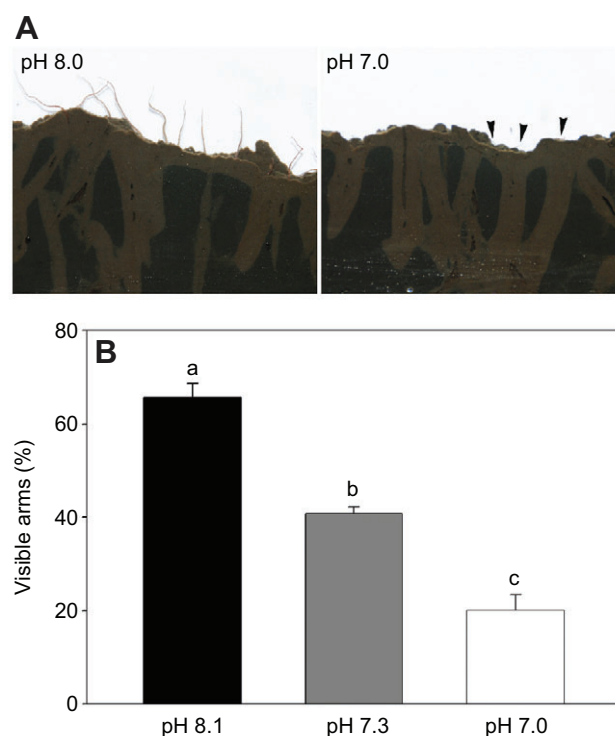

**Fig. 4. Amount of arms visible during the 4 week incubation in the different pH treatments.** (A) Photographs taken in 'thin aquaria' of pH 8.1- and pH 7.0-treated animals after 2 weeks incubation time. Arrows indicate the position of visible arms lying on the sediment surface in the low pH treatment. (B) Percentage visible arms in the different pH treatments. Values are given as means  $\pm$  s.e.m. Significant differences between treatments are indicated by different letters (one-way ANOVA,  $F = 65.202$ ,  $P < 0.001$ , followed by *post hoc* Holm–Sidak test,  $N = 4$ ).

$CO_2$ -treated animals over a time course of 15 days (Fig. 5). Under pH 8.1 (0.05 kPa  $P_{CO_2}$ ) conditions,  $pH_e$  was  $\sim 0.2$  to  $0.3$  units below the environmental pH. When exposed to low pH conditions, the  $pH_e$  dropped within 48 h to  $7.64 \pm 0.06$  and  $7.52 \pm 0.05$  at an ambient pH of 7.63 (0.15 kPa  $P_{CO_2}$ ) and 7.3 (0.32 kPa  $P_{CO_2}$ ), respectively (Fig. 5A). Over the course of 10 days the  $pH_e$  remained relatively stable at the respective pH levels. The calculation of  $HCO_3^-$  levels in the coelomic fluid indicates that under pH 8.1 conditions *A. filiformis* has high extracellular  $HCO_3^-$  levels ( $6\text{--}7\text{ mmol l}^{-1}$ ) compared with the surrounding seawater ( $2\text{--}2.5\text{ mmol l}^{-1}$ ). When exposed to lowered sea water pH, animals significantly increase their extracellular fluid  $[HCO_3^-]$  to  $8\text{--}9\text{ mmol l}^{-1}$  within 48 h (Fig. 5B). In the following days, extracellular fluid  $[HCO_3^-]$  was maintained at elevated levels in animals treated with decreased pH, compared with the control group.

### Regeneration and RMR (experiment 4)

Regeneration rate ( $\text{mm day}^{-1}$ ) was calculated as the coefficient of the significant linear regression between regenerate length (mm) and time (days). Regeneration rate was significantly (3.5 times) faster (ANCOVA;  $F = 73.03$ ,  $P < 0.0001$ ) in pH 8.1 ( $0.083 \pm 0.004\text{ mm day}^{-1}$ ;  $F = 369.36$ ,  $P < 0.0001$ ) compared with pH 7.0 ( $0.024 \pm 0.002\text{ mm day}^{-1}$ ;  $F = 216.58$ ,  $P < 0.0001$ ) (Fig. 6A,B). The differentiation index (DI as a percentage) was calculated as the proportion in length of the regenerate that is completely differentiated [ $DI = (DL/RL) \times 100$ , where DL is differentiated length and RL is total regenerate length, see Materials and methods], which serves as an indicator of functional recovery of the regenerate (see Dupont and Thorndyke, 2006). This calculated DI was  $59 \pm 12$  under control conditions after the



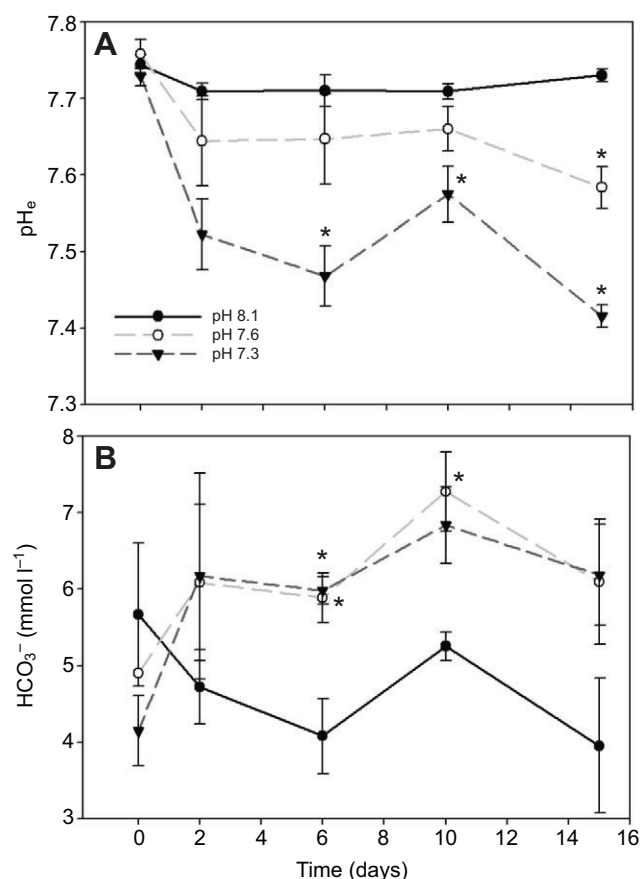

**Fig. 5. Extracellular acid–base status during hypercapnia treatment in the coelomic cavity of *A. filiformis*.** Animals were exposed to three different pH levels (pH 8.1, 7.6, 7.3) for 15 days. Extracellular pH ( $pH_e$ , A) and body fluid  $HCO_3^-$  levels (B) were determined before the start of the experiment and at four time points during the incubation period. Asterisks denote significant differences between treatment groups (one-way ANOVA,  $P < 0.05$ ). Values are given as means  $\pm$  s.e.m. ( $N=6$ ).

regeneration period of 18 days whereas no differentiation was observed in low pH-treated animals. In both treatments the formation of a blastema had been observed; however, regeneration seemed to be delayed or depressed in animals treated with decreased pH (Fig. 6).

The wound-healing and regeneration process is accompanied by significant changes in RMR (Fig. 7). Under control pH conditions, animals increased RMR immediately after amputation from  $0.93 \pm 0.06$  to  $1.04 \pm 0.05 \mu\text{mol O}_2 \text{ g}_{\text{FM}}^{-1} \text{ h}^{-1}$ . These animals further increased their RMR up to 6 days post-amputation, reaching up to  $1.27 \pm 0.07 \mu\text{mol O}_2 \text{ g}_{\text{FM}}^{-1} \text{ h}^{-1}$ . In the following days, RMR progressively declined, returning to starting levels at 18 days post-amputation (Fig. 7A). In contrast, RMR of animals regenerating in pH 7.0 seem to initially increase as observed for pH 8.0 animals. However, instead of continuing to increase until 6 days post-amputation, RMR declined after 2 days post-amputation and stayed at background levels of  $\sim 0.9\text{--}1.0 \mu\text{mol O}_2 \text{ g}_{\text{FM}}^{-1} \text{ h}^{-1}$  (Fig. 7B).

## DISCUSSION

### Abiotic conditions within burrows

While surrounding seawater has a pH of 8.1, *A. filiformis* experience a pH lower than 7.7 and strong hypoxic conditions within their sediment burrows. Oxygenation of *A. filiformis* burrows and the oxygenation of the surrounding sediment reported in the literature corroborate our findings, demonstrating that oxygen concentrations

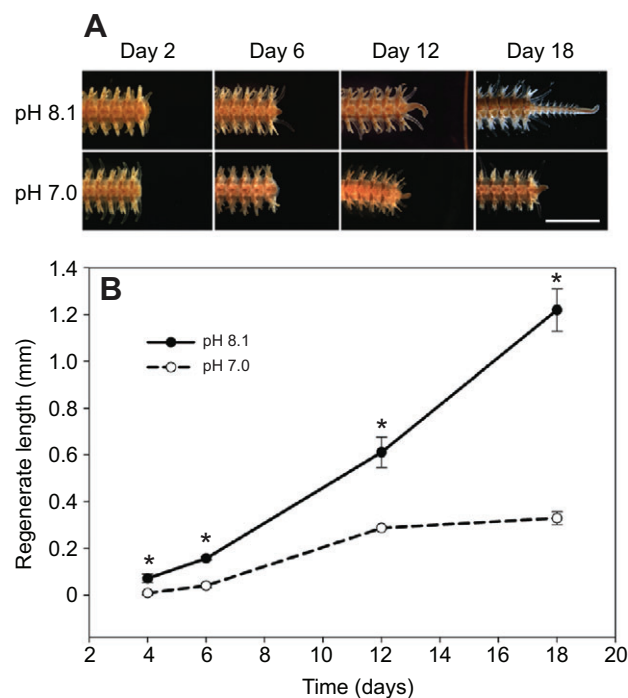

**Fig. 6. Effects of seawater acidification on regeneration.** (A) Images showing sequential regeneration and regenerate length for animals exposed to pH 8.1 and pH 7.0 conditions. (B) Regeneration during pH 8.1 and pH 7.0 treatments along the experimental period of 18 days. Values are given as means  $\pm$  s.e.m. ( $N=4\text{--}6$ ). Asterisks denote a significant difference between treatments ( $P < 0.05$ ).

decrease with depth in burrows (Vopel et al., 2003). This is a consequence of anoxic conditions within the sediment itself and the metabolism of the animal that demands continuous uptake of  $\text{O}_2$ . Two-dimensional pH distributions in marine sediments demonstrated rapid changes in pH by  $\pm 2$  units within millimeters ranging from pH 6 to pH 8 (Zhu et al., 2006). Such acidified conditions in marine sediments can be explained by the aerobic decomposition of organic matter producing  $\text{CO}_2$  and the reoxidation of anaerobic metabolites such as  $\text{NH}_4^+$ ,  $\text{HS}^-$  and  $\text{Fe}_2^+$  (Zhu et al., 2006).

Our study also demonstrates that acidification in the overlaying seawater led to an additive acidification in the burrow water to maintain a  $\text{CO}_2$  gradient of  $\sim 0.05 \text{ kPa}$  between burrow water (3 cm depth) and the overlaying water column. The finding that burrows contained live animals suggests that despite the potential ability of *A. filiformis* to ventilate their burrows with their arms (see Vopel et al., 2003),  $P_{\text{CO}_2}$  levels within burrows were significantly affected by  $\text{CO}_2$ -induced seawater acidification. Ventilation to control abiotic conditions inside sediment burrows has been reported for other marine taxa including polychaetes (Marinelli, 1994), crustaceans (Stamhuis and Videler, 1998) and some burrowing fish species (Atkinson et al., 1987). The fact that acidified conditions negatively affected the sweeping activity of arms in the water column could suggest that active ventilation of the burrows by the animal may be affected as well. This indicates the importance of considering not only the environmental and local variations in abiotic parameters (McElhany and Busch, 2013) but also variations seen by many organisms in their micro-habitats. In this context the present work demonstrates that *A. filiformis* is already being confronted with pH levels predicted for the coming 100 years in open ocean surface waters. pH 7.7 is the extreme of pH natural variability experienced today and pH levels down to 7.3 may be the extreme of near-future natural variability. Moreover,

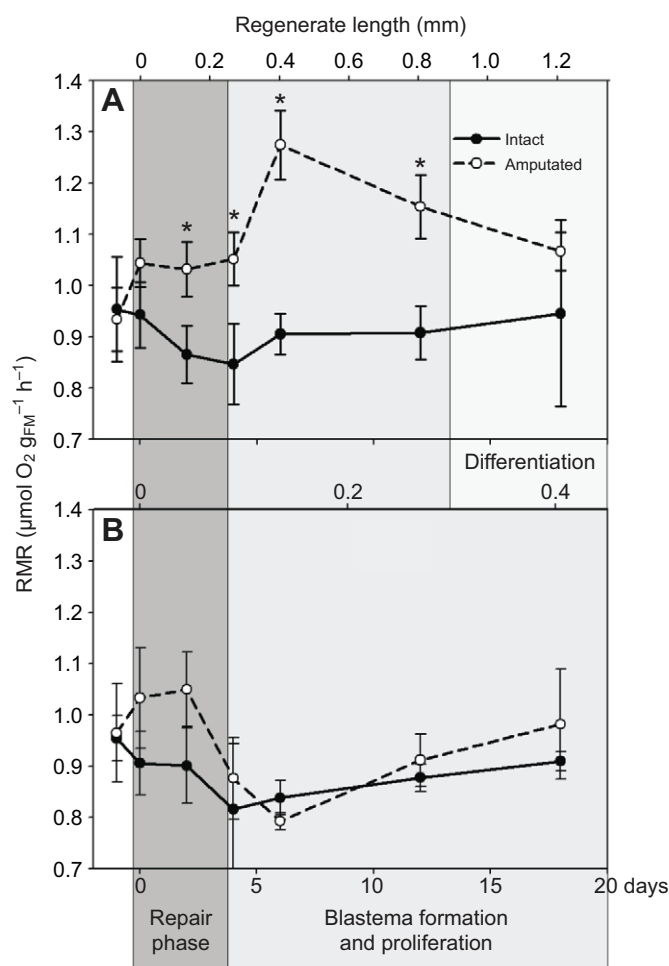

**Fig. 7. RMR during regeneration under acidified conditions.** Comparison of RMR along a regeneration period of 18 days for *A. filiformis* exposed to pH 8.1 (A) and pH 7.0 (B) conditions. Intact animals were used as the control group. RMR as a function of regenerate length is given by the x-axis at the top. Different gray shades indicate phases of the healing and regeneration process. Asterisks denote significant differences (Student's *t*-test,  $P < 0.05$ ) between treatments. Values are given as means  $\pm$  s.e.m. ( $N=6$ ).

potential leakage of pure CO<sub>2</sub> from CCS sites can easily lead to a local acidification of burrow water to  $< \text{pH } 7.3$  and can be expected to significantly affect physiological processes of burrowing organisms like *A. filiformis*, which are discussed below.

### Physiology and behavior

Our  $\text{pH}_e$  measurements suggest that *A. filiformis* is a weak acid–base regulator, similar to other echinoderms, which cannot fully compensate for an extracellular acidosis during environmental hypercapnia. However, in accordance to other echinoderms (see Stumpp et al., 2012), *A. filiformis* was able to accumulate up to  $1.5\text{--}2.5 \text{ mmol l}^{-1} \text{ HCO}_3^-$  in body fluids in response to an extracellular acidosis. In contrast, organisms that can fully restore  $\text{pH}_e$  during acidosis (e.g. fish and crustaceans) can actively accumulate  $\text{HCO}_3^-$  in the  $10\text{--}20 \text{ mmol l}^{-1}$  range at hypercapnia levels of  $0.5\text{--}1 \text{ kPa } P_{\text{CO}_2}$  (Larsen et al., 1997; Pane and Barry, 2007). An uncompensated acidosis has been demonstrated to induce metabolic depression (Pörtner et al., 2000; Pörtner et al., 2004). Metabolic depression is a major strategy in most invertebrate phyla and all vertebrate classes to survive environmental stress (Dezwaan and Wijsman, 1976; Guppy, 2004; Ramnanan and Storey, 2006). A

number of recent studies indicated that mild hypercapnia does not affect or even stimulates metabolism whereas more severe hypercapnic conditions can lead to depressed metabolic rates (Thomsen and Melzner, 2010; Dorey et al., 2013). In accordance with these observations, our work demonstrated that moderate seawater acidification ( $\text{pH } 7.3$ ) does not elicit metabolic depression but has the tendency to increase metabolic rates during a 4 week acclimation period. A similar moderate acidification-induced stimulation of metabolic rates has been previously observed in several marine invertebrates, including brittlestars *A. filiformis* and *Ophiocten sericeum* (Wood et al., 2008; Wood et al., 2011), the bivalve *Mytilus edulis* (Thomsen and Melzner, 2010), pluteus larvae of sea urchins (Stumpp et al., 2011b) and the Arctic pteropod *Limacina helicina* (Comeau et al., 2010). These studies suggested increased energetic demands to fuel compensatory mechanisms to maintain calcification rates and acid–base homeostasis. However, our study also demonstrated that prolonged exposure to stronger acidification ( $\text{pH } 7.0$ ) resulted in a 31% reduction of RMR in *A. filiformis*. Similar observations were made in other marine invertebrates like the worm *Sipunculus nudus*, where hypercapnia-induced reductions in  $\text{pH}_e$  (and not in internal pH) were demonstrated to elicit metabolic depression as indicated by reduced oxygen consumption rates in isolated muscle tissues (Reipschläger and Pörtner, 1996). Furthermore, recent work conducted on sea urchin larvae demonstrated that moderate acidification increase metabolic rates whereas pH levels  $< 6.5$  significantly reduced respiration rates (Dorey et al., 2013). In the present work the depression of metabolic rates in the low pH treatment is further underlined by a general downregulation pattern in arm tissues of genes involved in energy-consuming (e.g. acid–base genes) as well as energy-providing (metabolic genes) processes. Although not tested at the protein level, these results suggest that genes coding for metabolic and acid–base regulatory processes are expressed at lower rates under acidified conditions. Such a modulation of physiological processes (e.g. reduction of protein synthesis and downregulation of energy-providing processes) has been described to be a general feature of organisms undergoing metabolic depression (Guppy and Withers, 1999). Interestingly, expression profiles of body tissues did not demonstrate such a clear downregulation pattern as observed for arm tissues. This differential, tissue-specific response could have two possible explanations: (i) body tissues maintain routine functionality despite metabolic depression in arm tissues or (ii) arm tissues are the major site of energy metabolism, respiration and ion regulation whereas body tissues mainly serve reproduction and nutrient absorption. The latter is supported by behavioral observations demonstrating that during exposure to acidified conditions, *A. filiformis* retract their arms into burrows. This behavioral response could be interpreted as an energy-saving mechanism to reduce additional energetic costs for suspension feeding by sweeping their arms in the water column. Reduced activity may also translate into decreased bioturbation of sediments, which has been hypothesized to affect nutrient flux between water and sediment (Wood et al., 2009). Moreover, retraction of arms during hypercapnic exposure may lead to reduced feeding rates as well as reduced ventilation of burrows, which could have a negative feedback on the animal's energy budget and hypercapnic conditions inside the sediment burrows. Thus, determinations of feeding rates in combination with energetic expenses during environmental hypercapnia represent an important task for future research.

Besides increased metabolic rates at moderate pH and decreased metabolic rates at low pH levels, the present work demonstrates that *A. filiformis* increases  $\text{NH}_4^+$  excretion rate at both moderate and high

hypercapnia levels. Higher  $\text{NH}_4^+$  excretion rates in response to decreased seawater pH significantly decreased the O:N ratio from control to low pH treatments. Measured metabolic and  $\text{NH}_4^+$  excretion rates as well as O:N ratios are comparable to published values for *A. filiformis* and other brittlestars from temperate latitudes (Davoult et al., 1991; Christensen and Colacino, 2000; Talbot and Lawrence, 2002; Vopel et al., 2003) as well as other echinoderms such as the sea urchins *Psammechinus miliaris* (Otero-Villanueva et al., 2004) and *Sterechinus neumayeri* (Hill and Lawrence, 2006). Moreover, the O:N ratio in *P. miliaris* maintained on an algal diet was 37 while urchins fed with mussel or salmon tissue decreased the ratio to 29 and 12, respectively (Otero-Villanueva et al., 2004). This indicates that diet composition directly translates into altered O:N ratios. Based on histological studies, Wood et al. (Wood et al., 2008) suggested that unfed *A. filiformis* increases protein metabolism by the breakdown of muscle tissues to fuel increased energetic demands in response to seawater acidification. It is likely that enhanced catabolism and cell turnover/differentiation of muscle tissues following traumatic amputation in brittlestars and crinoids is related to cell differentiation to produce stem cells to regenerate lost tissues rather than fueling calcification processes (Candia Carnevali and Bonasoro, 2001; Biressi et al., 2010). However, despite increased  $\text{NH}_4^+$  excretion rates, the present study could not demonstrate any changes in ratios between ADM and DM between pH treatments, which would have indicated an increased utilization of muscle tissue or other amino acid compounds as an energy source. However, higher  $\text{NH}_4^+$  excretion rates can be directly linked to acid–base compensatory processes (Shih et al., 2008; Wu et al., 2010). It has been hypothesized that secretion of  $\text{NH}_4^+$  derived from protein catabolism serves as an additional acid extrusion mechanism in the mussel *M. edulis* (Thomsen and Melzner, 2010), the sea urchin *Strongylocentrotus droebachiensis* (Stumpp et al., 2012) and the worm *S. nudus* (Langenbuch and Pörtner, 2002). In this context the importance of Rhesus proteins needs to be mentioned as these were recently discovered to be associated with acid–base regulatory abilities in various marine taxa (Weihrauch et al., 2009; Nawata et al., 2010; Hu et al., 2013). Future studies are needed to broaden our understanding regarding the pathways of  $\text{NH}_4^+$ -based acid–base regulatory mechanisms in marine invertebrates.

### Regeneration

The present work demonstrates increased demands of aerobic metabolism during the course of regeneration of autotomized arm tissues. This supports hypotheses formulated in earlier studies which suggested that regeneration in brittlestars is linked to significant energetic costs (Fielman et al., 1991; Pomory and Lawrence, 1999). In particular, the initial phase of regeneration, which is characterized by cell proliferation (Thorndyke et al., 2001; Dupont and Thorndyke, 2006), seems to require significant energetic costs that derive from aerobic metabolism. Environmental acidification leads to a reduction of the metabolic scope of regeneration.

This reduction in metabolic scope for regeneration processes is associated with a significant decrease in regeneration rate in *A. filiformis* exposed to decreased pH. This contrasts with the finding of Wood et al. (Wood et al., 2008) of increased regeneration rates in the same species exposed to decreased seawater pH. These different results are probably due to methodological differences: in the study by Wood et al. (Wood et al., 2008), amputations were not standardized whereas in the present study arms were cut at 1 cm from the disc in all animals, which minimized differences in regeneration rate (Dupont and Thorndyke, 2006). However, the results of the present work are in general accordance with observations made in brittlestars exposed

to osmotic challenges. For example, the brittlestar *Ophiophragmus filigraneus* has been demonstrated to reduce regeneration rates down to 25% compared with control animals when exposed to hyposaline conditions (Talbot and Lawrence, 2002). Interestingly, under this hypoosmotic stress, reduced regeneration rates of *O. filigraneus* were accompanied by reduced metabolic rates and increased  $\text{NH}_4^+$  excretion, in a similar manner to that observed in the present study. It can be hypothesized that ionic disturbances in general, including acid–base and osmotic challenges, may trigger very similar physiological responses at certain threshold levels.

### Conclusions

Our work highlights the importance of considering micro-habitats when designing experiments on ocean acidification. The infaunal brittlestar *A. filiformis* experiences naturally low oxygen and pH conditions within sediment burrows. A decrease in seawater pH is additive to the naturally low pH within the burrows. More studies on abiotic parameters in sediment burrows are needed in order to fully understand the effects of acidification on these microhabitats, and how far organisms are able to control and cope with this microenvironment.

Our results also indicate that *A. filiformis* cannot tolerate prolonged exposure to pH 7.0 as indicated by the onset of metabolic depression. This effect on aerobic metabolism reduces the metabolic scope for regeneration, which, in turn, has severe repercussions in terms of the regenerative capacity of autotomized arm tissues. Our results suggest that adult *A. filiformis* are relatively robust to  $\text{CO}_2$ -induced seawater acidification (down to pH 7.3, predicted extreme of natural variability by 2100) as predicted for the coming century as a consequence of anthropogenic  $\text{CO}_2$  emissions. However, stronger acidification down to a pH of 7.0, as may be locally expected for potential leakage from CCS sites, can significantly affect the fitness of this ecologically important species.

### MATERIALS AND METHODS

#### Animals and sampling site

Sediment containing *Amphiura filiformis* was collected at 30–35 m depth, using a box corer, in the vicinity of The Sven Lovén Centre for Marine Sciences (SLC), Kristineberg, Sweden, in September 2011. Individuals were immediately collected from sediment cores by gentle rinsing to avoid breaking of arms, and maintained in natural flowing deep seawater at 12°C, pH 8.0 and a salinity of 31. Animals were acclimated to lab facilities 3 weeks prior to the start of experiments.

In total we conducted four separate experiments to determine behavior, respiration and ammonia excretion rates, growth, extracellular acid–base status and regeneration capacity in *A. filiformis*, and abiotic conditions within the sediment burrows. Depending on the experiment, we let the animals bury in their natural sediment (experiment 1 and 3) or not (experiment 2 and 4). We applied between two (experiment 3 and 4) and three (experiment 1 and 2) pH treatments based on the following assumptions. Natural seawater pH of 8.1 was used as the control condition. Medium pH drops down to pH 7.6 and 7.3 can be expected to occur within the next few centuries as a result of rising atmospheric  $P_{\text{CO}_2}$  conditions and were used as simulated ocean acidification scenarios. Low pH treatments (pH 7.0) were applied as a potential carbon capture storage scenario and can also be expected to occur in sediment burrows in predicted ocean acidification scenarios (in experiments without sediment).

All experiments were performed in accordance with the Swedish law for animal welfare and were approved by the animal welfare officers of the University of Gothenburg.

#### Experiment 1: determination of abiotic parameters within burrows

Intact specimens with a disc diameter of 5–6 mm and fresh mass ranging from 216 to 275 mg that showed no evidence of recent regeneration events



and no apparent gonads were used in all experiments.  $O_2$  and pH in *A. filiformis* burrows were measured using fiber optic oxygen and pH sensors (PreSens oxygen micro optode, type PSt1; PreSens pH microsensors NTH-HP5-L5) mounted on a micromanipulator and connected to a fiber optic oxygen and pH transmitter, respectively (Oxy4 Micro and pH Micro, PreSens, Regensburg, Germany). The sensors were calibrated according to the manufacturer's instructions.

'Thin aquaria' filled with sieved mud (dimensions  $8 \times 18 \times 1$  cm) as described previously (Rosenberg et al., 1991) were equipped with 10–12 animals each, allowing us to observe the vertical position and burrows within the sediment. Experimental thin aquaria were supplied with seawater from independent header tanks at a flow rate of  $40\text{--}45\text{ ml min}^{-1}$ , and were adjusted to the respective pH using a computerized feedback system as described above (pH 8.1 and 7.0). All experiments were set up as two controls (pH 8.1;  $>90\%$   $O_2$  saturation) and two parallels where pH was lowered to pH 7 (0.63 kPa  $CO_2$ ). Experiments were repeated two to three times, resulting in a total independent replicate number of  $N=4\text{--}6$ .  $O_2$  and pH in different depth levels (0, 5, 10, 15, 20 and 30 mm) of burrows were measured visually (accuracy  $\pm 100\text{ }\mu\text{m}$ ). In total, we measured at least 10 different burrows, containing live animals for each depth level. Seawater was sampled from the burrows using a gastight syringe (Hamilton) mounted on a micromanipulator. Alkalinity from seawater samples was essentially determined spectrophotometrically (ND-2000, NanoDrop Technology, Wilmington, DE, USA) according to Sarazin et al. (Sarazin et al., 1999) in a volume of  $1.5\text{ }\mu\text{l}$ . The carbonate system speciation was calculated as described above.

#### Experiment 2: 4 week low pH exposure within natural sediments

Animals were maintained in a flow-through seawater system consisting of 12 PVC aquaria (5 l volume) in a  $10^\circ\text{C}$  climate chamber at the SLC. A light regime with a 12 h:12 h light:dark cycle was chosen. Natural flowing deep seawater with a salinity of  $31 \pm 0.07$  was distributed to the experimental aquaria at a rate of  $50\text{ ml min}^{-1}$ . Before the start of the experiments the animals were maintained in these tanks under control conditions for 10 days. Each of the experimental tanks contained 15 individuals that were allowed to bury in 4 cm of sieved (0.7 mm) sediment from the collection site. Three pH levels (control pH 8.1, medium pH 7.3 and low pH 7.0) with four replicates each were continuously maintained in the respective aquaria using a computerized feedback system (AquaMedic) that regulates pH (NBS scale) by addition of pure gaseous  $CO_2$  directly into the seawater ( $\pm 0.05$  pH units). pH was controlled independently in each aquarium and aquaria were randomly arranged with respect to pH level. pH, temperature and salinity were monitored daily and total alkalinity was determined once a week during the incubation time and was essentially measured following Sarazin et al. (Sarazin et al., 1999). pH was monitored using a Metrohm (827 pH lab)  $pH_{NBS}$  meter. The carbonate system speciation was calculated from  $pH_{NBS}$  and alkalinity using CO2SYS (Lewis and Wallace, 1998) (Table 1) with dissociation constants from Mehrbach et al. (Mehrbach et al., 1973) refitted by Dickson and Millero (Dickson and Millero, 1987). The measured carbonate chemistry is in accordance with field conditions with  $pH_{NBS}$  levels of  $8.0\text{--}8.1$  at  $10^\circ\text{C}$  and an alkalinity ranging from 2.15 to 2.3 mmol.

The total duration of the experiment was 4 weeks and behavioral observations, oxygen consumption,  $NH_4^+$  excretion measurements (see below for methods) and tissue sampling were performed once every 7 days after the start of the experiment (four times in total). Before each sampling time point, the total number of visible arms that were extended into the water column or laying on the sediment was determined for each tank. Three specimens from each aquarium (three pH levels, four replicates, four time points, three animals per time point and aquarium) were gently taken from the sediment and rinsed with seawater from the respective  $P_{CO_2}$  treatment to remove particles from the animals. Two animals were used for respiration and  $NH_4^+$  excretion measurements and the remaining animal was used for gene expression analysis. Metabolic and  $NH_4^+$  excretion rates from each replicate aquarium and sampling time point were averaged over the time course of 4 weeks ( $N=4$ ). For gene expression analyses, arms were removed from the body using forceps and both body parts (arms and body) were shock-frozen in liquid nitrogen and stored at  $-80^\circ\text{C}$ .

#### Experiment 3: determination of extracellular (perivisceral coelomic fluid) acid–base status

To investigate the effects of  $CO_2$ -induced seawater acidification on  $pH_e$  homeostasis, specimens were maintained in a flow-through seawater system consisting of nine PVC aquaria (5 l volume; for more details see experiment 1). Before the start of the experiments the animals were acclimated in these tanks under control conditions for 5 days. Each of the experimental tanks contained 48 individuals. For practical reasons and to avoid sediment effects on pH exposure, animals were kept without sediment. Three pH levels (control pH 8.1, medium pH 7.6 and low pH 7.3) with three replicates each were continuously maintained in the respective aquaria as described above. Seawater physiochemical parameters were measured and calculated as in experiment 1 and are given in Table 1. The total duration of the experiment was 15 days and extracellular pH measurements were performed at five time points: 0, 2, 6, 10 and 15 days. In total, two specimens (one for pH and one for alkalinity measurements) from each aquarium (three pH levels, three replicates, five time points, three animals per time point and aquarium) were gently taken from the aquaria and excess water was removed on a paper tissue.  $pH_e$  was determined within 30 s at  $10^\circ\text{C}$  by insertion of fiber optic pH sensors (PreSens pH microsensors NTH-HP5-L5; tip diameter  $150\text{ }\mu\text{m}$ ) into the coelomic cavity. The sensors were calibrated according to the manufacturer's instructions at the same ambient temperature of  $10^\circ\text{C}$ . For total alkalinity measurements,  $5\text{ }\mu\text{l}$  of coelomic fluid were quickly sampled from the coelomic cavity using a gastight syringe with a 21 gauge needle. The entire sampling of coelomic fluid was completed in less than 1 min. The coelomic fluid was transferred to an Eppendorf tube and centrifuged for 60 s ( $6000\text{ rpm}$ ;  $4300\text{ g}$ ) using a minifuge (Capsulefuge PMC-880 Gilson);  $3\text{ }\mu\text{l}$  of the supernatant was used for further analyses. Alkalinity from coelomic fluid samples was determined spectrophotometrically (ND-2000, NanoDrop Technology) according to Sarazin et al. (Sarazin et al., 1999) in a volume of  $1.5\text{ }\mu\text{l}$ . The carbonate system was calculated as described in the previous section.

#### Experiment 4: effects of seawater hypercapnia on arm regeneration

To determine the impact of low pH and regeneration on metabolic rate, 48 brittlestars were divided into two groups for the hypercapnia treatment (pH 8.1 and pH 7.0) consisting of 12 control (intact) and 12 animals with amputations. Regeneration rates are dependent on the position of amputation (arm loss) (Dupont and Thorndyke, 2006) and three arms were amputated at 1 cm from the disc to favor fast regeneration. Intact animals and those with amputations were placed in the same aquaria of the respective  $P_{CO_2}$  treatment and continuously supplied with fresh seawater ( $40\text{--}45\text{ ml min}^{-1}$ ). For practical reasons and to avoid sediment effects on pH exposure, animals were kept without sediment and were separated individually in 6-well plates (each well had a volume of 15 ml) covered with a net (mesh size  $1.5\text{ mm}$ ) to avoid interaction between individuals and to be able to track individuals along the experimental period. Respiration rates were determined (see below) as described before at 0, 1, 2, 4, 6, 12 and 18 days post-amputation in both regenerating and intact animals. The fresh mass of each individual was determined before the start of the experiment. In three experiments conducted at different times but with the same experimental design, amputated brittlestars maintained under both pH (8.1 and 7.0) levels were removed from the aquaria every 4, 6, 12 and 18 days, anesthetized with iso-osmotic 4%  $MgCl_2$ , and the total length of the regenerate and the length of the differentiated part of the regenerate (fully formed segments with clearly developed ossicles, podia and spines) were measured using a dissecting microscope (Leica MZ 16 A) (see Dupont and Thorndyke, 2006).

#### Determination of oxygen consumption and $NH_4^+$ excretion rates

Animals were placed in glass respiration chambers with a volume of 26 ml containing  $0.45\text{ }\mu\text{m}$  filtered seawater equilibrated with the appropriate  $P_{CO_2}$  level. Respiration chambers were closed, submerged in a water bath at  $10^\circ\text{C}$  and oxygen saturation was measured continuously (once every 30 s) for 2–3 h using fiber optic oxygen sensors (PreSens oxygen micro optode, type PSt1) placed in the lid of respiration chambers that were connected to a OXY-4 mini multichannel fiber optic oxygen transmitter (PreSens). The



sensors were calibrated according to the manufacturer's instructions. Preliminary experiments demonstrated that the brittlestars could not sufficiently mix the water volume. Therefore, two syringes were connected via gas-tight connectors to the respiration chambers to gently mix the water every 20 min. This resulted in a linear decrease of oxygen concentration during the incubation period. We avoided decreases in oxygen concentration below the 70% air saturation level. After the respiration measurement, animals were removed from the chambers and the missing water volume was refilled with 0.45 µm filtered seawater; respiration chambers were then closed and monitored for 6–12 h for detection of background respiration. Bacterial respiration never exceeded 10% of animal respiration. Prior to the start of the incubation, animals were acclimated for 30 min in the respiration chambers. For calculation of oxygen consumption rates, the linear decrease in oxygen concentration between the start and end of the measurement period was considered. Subsequently, body mass of individuals was measured. Oxygen consumption rates ( $\dot{M}_{O_2}$ ) are expressed as µmol O<sub>2</sub> g<sub>FM</sub><sup>−1</sup> h<sup>−1</sup>.

Ammonium excretion rates were determined from NH<sub>4</sub><sup>+</sup> concentration measurements prior to and following incubation of brittlestars for respiration measurements. Before closing and after opening respiration chambers, a 1 ml seawater sample was removed for NH<sub>4</sub><sup>+</sup> measurements. NH<sub>4</sub><sup>+</sup> concentration in seawater samples was determined using the indophenol method and measurements were conducted using an automated spectrophotometer (TRAACS 2000, Bran&Luebbe, Norderstedt, Germany) calibrated with a standard series of known NH<sub>4</sub><sup>+</sup> concentrations.

Additionally, a separate glass chamber without a brittlestar was also incubated to determine background readings of filtered seawater for ammonium excretion and respiration rates. Ammonia (NH<sub>3</sub>) was not measured as NH<sub>3</sub> concentrations at pH values of 8–7.1 are negligible (0.2–2% of total ammonium/ammonia) (Körner et al., 2001). Ammonium excretion rates are expressed as µmol NH<sub>4</sub><sup>+</sup> g<sub>FM</sub><sup>−1</sup> h<sup>−1</sup>. The oxygen to nitrogen ratio, which serves as an indicator of protein metabolism, was calculated according to the following equation:

$$O : N = 2\dot{M}_{O_2} (\text{NH}_4^+ \text{ excretion})^{-1}.$$

Table 2. Primer sequences used for qRT-PCR

| Gene                                                         | Abbreviation   | Function                       | Primer sequence 5'–3'                                            | Amplicon length |
|--------------------------------------------------------------|----------------|--------------------------------|------------------------------------------------------------------|-----------------|
| Ion-regulation                                               |                |                                |                                                                  |                 |
| Na <sup>+</sup> /H <sup>+</sup> -exchanger 3 regulator       | <i>NHE3reg</i> | Regulation of NHE3             | F: GAAAAAGGAAACACGGACAATTATAC<br>R: CCTGGTTTCACTCCCGCTAA         | 77              |
| V-type H <sup>+</sup> -ATPase subunit V0                     | <i>VHAV0</i>   | Active proton secretion        | F: AACAAATCCACTATGGCGTCTTCT<br>R: GCTACGCATTCTGCTATCCATACTAT     | 88              |
| Na <sup>+</sup> /HCO <sub>3</sub> <sup>−</sup> cotransporter | <i>NBCe</i>    | Secondary active ion transport | F: CCCAAGTTGTGCGCTGTAGAG<br>R: GCATTGGAATAACCGTAATAATTTGTC       | 104             |
| Na <sup>+</sup> /K <sup>+</sup> -ATPase                      | <i>NKA</i>     | Electrochemical gradient       | F: CATGCCACACTGCTTTCTTTG<br>R: GTGAGTTCTTCTGGTCTTGCA             | 81              |
| Aquaporin 9                                                  | <i>AQP9</i>    | Channel protein                | F: GATGAACGGCTCCATACCATCT<br>R: TTGGCACACTTCTACTGATGCTTT         | 86              |
| Metabolism                                                   |                |                                |                                                                  |                 |
| Lactate dehydrogenase                                        | <i>LDH</i>     | Anaerobic metabolism           | F: ATGTGTTTCAGCCAGGAGTAACAAG<br>R: GCACCAGGATCTATAGGAAAGCAT      | 84              |
| Glucose 6-phosphate dehydrogenase                            | <i>G6PDH</i>   | Glycolysis                     | F: GGTTCCACCGCCAAAATATC<br>R: TAAAGCCTTAAACGAAACGTAAAGCA         | 79              |
| Succinate dehydrogenase                                      | <i>SuDH</i>    | Respiratory chain/Krebs cycle  | F: GAACAGTTTGCTACGTGCGAAT<br>R: CAACATGGCAGGCATGTTTT             | 75              |
| Amino acid catabolism                                        |                |                                |                                                                  |                 |
| Glutamate dehydrogenase                                      | <i>GlutDH</i>  | Protein metabolism             | F: GGTGCTACGGAGAAGGATATAGTGA<br>R: TGCTGTTCTCATATTTGCCTAGCT      | 81              |
| Alanine transaminase                                         | <i>AlaT</i>    | Protein metabolism             | F: TGAAGAGAGTGGTTGGAGTCTACAGA<br>R: CTACCATAGCAACTGGTTTACAGTGTTT | 89              |
| Aspartate transaminase                                       | <i>AspT</i>    | Protein metabolism             | F: CATGGGTCTCTATGGTGAACGA<br>R: GTGACTCACATCTCTTGGCTTCAT         | 80              |
| Reference gene                                               |                |                                |                                                                  |                 |
| Ubiquitin-conjugated enzyme                                  | <i>UCE</i>     | Protein degradation            | F: TTTCACAACTAAGATCTATCATCAAACA<br>R: TGGTGACCACTGTGACCTCAAG     | 82              |

F, forward; R, reverse.

Biometric analyses

Biometric parameters of animals from the CO<sub>2</sub> perturbation experiment (experiment 2) were analyzed using whole-animal FM, DM, AFDM and ash content (ADM) of several body parts (body and arms).

Mass was determined using a precision scale (AT261 Deltarange, Mettler, Giessen, Germany). After determination of wet mass following gentle drying of animals on a paper towel, body parts were dried at 60°C for 20 h (Modell 400, Memmert, Schwabach, Germany) and mass was determined again. ADM was determined by placing arms and body parts in a drying oven at 550°C for 20 h (B170, Nabertherm, Bremen, Germany) prior to mass determination. AFDM was then calculated by subtracting ADM from DM of the arms and bodies, respectively. Biometric measurements including determination of disc diameter, WM, DM and ADM were conducted with brittlestars that were used for respiration and ammonium excretion trials after the physiological measurements were completed. For statistical analyses, values of single individuals (two per replicate) were averaged and the N=4 experimental aquaria per pH level were considered the unit of replication.

Preparation of mRNA

Frozen arm and disc tissues from *A. filiformis* were homogenized in Tri reagent (Sigma-Aldrich, T-9424). Samples were centrifuged for 10 min at 12,000 g and the pellet was discarded to remove all calcium carbonate from tissues. Total RNA was purified using the Ribopure column system (Ambion, Austin, TX, USA) following the manufacturer's protocol. DNA contamination was removed with DNase I. The amount of mRNA was determined by spectrophotometry (ND-2000, NanoDrop Technology). All mRNA pellets were stored at −20°C.

Real-time quantitative PCR (qPCR)

The mRNA expressions of target genes were measured by qPCR using the Applied Biosystems 7300 Real Time PCR System. *Amphiura filiformis* sequences were obtained from a 454 sequencing library of regenerating arm tissues (O.O.-M., unpublished data). Sequences used for gene expression studies were translated into amino acid sequences, entered in a BLAST

search and aligned with sequences from other echinoderms (supplemental material Fig. S1). Primers were designed (Table 2) using primer analysis software (Primer Express version 2.0, Applied Biosystems) with the default parameters of the TaqMan MGB Probe and Primer design procedure. PCRs contained 2 ng of cDNA, 50 nmol l<sup>-1</sup> of each primer and the SYBR Green MasterMix (Applied Biosystems) in a final volume of 10 µl. All qPCRs were performed as follows: 1 cycle of 50°C for 2 min and 95°C for 10 min, followed by 40 cycles of 95°C for 15 s and 60°C for 1 min (the standard annealing temperature of all primers). PCR products were subjected to a melting-curve analysis to verify that only a single product was present. Control reactions were conducted with DNase-treated RNA samples to determine levels of background and genomic DNA contamination. The standard curve of each gene was confirmed to be in a linear range with ubiquitin conjugated enzyme (*UCE*) as the reference gene. The expression of this reference gene was checked for stability and has been demonstrated to be stable in other marine species across ontogenetic stages and during CO<sub>2</sub> treatments (Hu et al., 2011; Hu et al., 2013; Tseng et al., 2013).

### Statistical analyses

For metabolic and NH<sub>4</sub><sup>+</sup> excretion rates, each of the four experimental replicates per treatment was used and averaged over the four time points. Normality of distributions was assessed via the Kolmogorov–Smirnov test. Differences between hypercapnia treatment groups were analyzed using one-factorial ANOVA followed by *post hoc* Tukey tests using Sigma Stat (Systat Software). A two-way ANOVA was performed for biometric and extracellular pH HCO<sub>3</sub><sup>-</sup> data with time and pH as variables followed by *post hoc* Holm–Sidak test. Percentage values of visible arms in relation to all arms were arcsine transformed prior to statistical analysis (one-way ANOVA). The threshold for significance was *P* < 0.05. Student's *t*-test was used to compare metabolic rates of animals with amputated arms and intact animals. The data in the text and figures are presented as the mean ± s.e.m.

### Acknowledgements

We greatly appreciate the assistance of H. Olsson during ammonia measurements and we would like to particularly thank B. Petersson and U. Schwarz for assistance and guidance during sample collection.

### Competing interests

The authors declare no competing financial interests.

### Author contributions

M.S., M.Y.H. and S.D. designed the study, conducted experiments, analyzed the data and compiled the manuscript with the help of all other co-authors. I.C. conducted CO<sub>2</sub> perturbation experiments including seawater carbonate chemistry analyses and analyzed the data. O.O.-M. provided sequence information and contributed to molecular analyses.

### Funding

This paper is a contribution to the European Project on 'Sub-seabed carbon storage and the marine environment' (ECO2) and the research leading to these results has received funding from the European Union, European Atomic Energy Community, Seventh Framework Programme [FP7/2007-2-13; FP7/2007-2011] under grant agreement no. 265847. I.C. and S.D. were financially supported by the Linnaeus Centre for Marine Evolutionary Biology at the University of Gothenburg (<http://www.cemeb.science.gu.se/>) and supported by a Linnaeus grant from the Swedish Research Councils VR and Formas. M.S. was financially supported by the Royal Swedish Academy of Sciences (Kungliga Vetenskapsakademien).

### Supplementary material

Supplementary material available online at <http://jeb.biologists.org/lookup/suppl/doi:10.1242/jeb.100024/-DC1>

### References

- Atkinson, R. J. A., Pelster, B., Bridges, C. R., Taylor, A. C. and Morris, S. (1987). Behavioural and physiological adaptations to a burrowing lifestyle in the snake blenny, *Lumpenus lampretaeformis*, and the red band-fish, *Cepola rubescens*. *J. Fish Biol.* **31**, 639–659.
- Bioresi, A. C. M., Zou, T., Dupont, S., Dahlberg, C., Di Benedetto, C., Bonaroso, F., Thorndyke, M. and Candia Carnevali, M. D. (2010). Wound healing and arm regeneration in *Ophioderma longicaudum* and *Amphiura filiformis* (Ophiuroidea, Echinodermata): comparative morphogenesis and histogenesis. *Zoomorphology* **129**, 1–19.
- Caldeira, K. and Wickett, M. E. (2003). Oceanography: anthropogenic carbon and ocean pH. *Nature* **425**, 365.
- Candia Carnevali, M. D. and Bonaroso, F. (2001). Microscopic overview of crinoid regeneration. *Microsc. Res. Tech.* **55**, 403–426.
- Christensen, A. B. and Colacino, J. M. (2000). Respiration in the burrowing brittlestar, *Hemipholis elongata* Say (Echinodermata, Ophiuroidea): a study of the effects of environmental variables on oxygen uptake. *Comp. Biochem. Physiol.* **127A**, 201–213.
- Comeau, S., Jeffree, R., Teyssié, J. L. and Gattuso, J. P. (2010). Response of the Arctic pteropod *Limacina helicina* to projected future environmental conditions. *PLoS ONE* **5**, e11362.
- Davault, D., Gounin, F. and Janquin, M.-A. (1991). Ammonium excretion by the opurid *Ophiophrix fragilis* as a function of season and tide. *Mar. Biol.* **111**, 425–429.
- de Zwaan, A. and Wijsman, T. C. M. (1976). Anaerobic metabolism in Bivalvia (Mollusca). Characteristics of anaerobic metabolism. *Comp. Biochem. Physiol.* **54B**, 313–323.
- Dickson, A. and Millero, F. (1987). A comparison of the equilibrium constants for the dissociation of carbonic acid in seawater media. *Deep Sea Res.* **A 34**, 1733–1743.
- Dorey, N., Lançon, P., Thorndyke, M. and Dupont, S. (2013). Assessing physiological tipping point of sea urchin larvae exposed to a broad range of pH. *Glob. Chang. Biol.* **19**, 3355–3367.
- Duineveld, G. C. A. and Van Noort, G. J. (1986). Observation of the population dynamics of *Amphiura filiformis* (Ophiuroidea: Echinodermata) in the Southern North Sea and its exploitation by the dab, *Limanda limanda*. *Neth. J. Sea Res.* **20**, 85–94.
- Dupont, S. and Pörtner, H. (2013). Marine science: get ready for ocean acidification. *Nature* **498**, 429.
- Dupont, S. and Thorndyke, M. C. (2006). Growth or differentiation? Adaptive regeneration in the brittlestar *Amphiura filiformis*. *J. Exp. Biol.* **209**, 3873–3881.
- Dupont, S. and Thorndyke, M. (2014). Direct impacts of near-future ocean acidification on sea urchins. In *Climate Change Perspective From the Atlantic: Past, Present and Future* (ed. J. M. Fernández-Palacios, L. de Nascimento, J. C. Hernández, S. Clemente, A. González and J. P. Díaz-González), pp. 461–485. Tenerife: Servicio de Publicaciones, Universidad de La Laguna.
- Dupont, S., Ortega-Martínez, O. and Thorndyke, M. (2010). Impact of near-future ocean acidification on echinoderms. *Ecotoxicology* **19**, 449–462.
- Evans, D. H., Piermarini, P. M. and Choe, K. P. (2005). The multifunctional fish gill: dominant site of gas exchange, osmoregulation, acid-base regulation, and excretion of nitrogenous waste. *Physiol. Rev.* **85**, 97–177.
- Fielman, K. T., Stanczyk, S. E., Dobson, W. E. and Jerome Clements, L. A. (1991). Effects of disc and arm loss on regeneration by *Microphiopholis gracillima* (Echinodermata: Ophiuroidea) in nutrient-free seawater. *Mar. Biol.* **111**, 121–127.
- Guppy, M. (2004). The biochemistry of metabolic depression: a history of perceptions. *Comp. Biochem. Physiol.* **139B**, 435–442.
- Guppy, M. and Withers, P. (1999). Metabolic depression in animals: physiological perspectives and biochemical generalizations. *Biol. Rev. Camb. Philos. Soc.* **74**, 1–40.
- Haugen, H. A. and Eide, L. I. (1996). CO<sub>2</sub> capture and disposal: The realism of large scale scenarios. *Energy Convers. Manag.* **37**, 1061–1066.
- Haugen, H. A., Aagaard, P., Thyberg, B., Kjåstad, J., Langlet, D., Melaaen, M. C., Liljemark, S., Bergmo, P., Skagestad, R., Mathisen, A. et al. (2011). CCS in the Skagerrak/Kattegat area. *Energy Procedia* **4**, 2324–2331.
- Heisler, N. (1989). Interactions between gas exchange, metabolism and ion transport in animals: an overview. *Can. J. Zool.* **67**, 2923–2935.
- Hill, S. K. and Lawrence, J. M. (2006). Interactive effects of temperature and nutritional condition on the energy budgets of the sea urchins *Arbacia punctulata* and *Lytechinus variegatus* (Echinodermata: Echinoidea). *J. Mar. Biol. Assoc. UK* **86**, 783–790.
- Hu, M. Y., Tseng, Y.-C., Stumpp, M., Gutowska, M. A., Kiko, R., Lucassen, M. and Melzner, F. (2011). Elevated seawater P<sub>CO2</sub> differentially affects branchial acid-base transporters over the course of development in the cephalopod *Sepia officinalis*. *Am. J. Physiol.* **300**, R1100–R1114.
- Hu, M. Y., Lee, J.-R., Lin, L.-Y., Shih, T.-H., Stumpp, M., Lee, M.-F., Hwang, P.-P. and Tseng, Y.-C. (2013). Development in a naturally acidified environment: Na<sup>+</sup>/H<sup>+</sup>-exchanger 3-based proton secretion leads to CO<sub>2</sub> tolerance in cephalopod embryos. *Front. Zool.* **10**, 51–67.
- IPCC (2005). Carbon dioxide capture and storage. In *IPCC Special Report* (ed. B. Metz, O. Davidson, H. de Coninck, M. Loos and L. Meyer). Cambridge: Cambridge University Press.
- Körner, S., Das, S. K., Veenstra, S. and Vermaat, J. E. (2001). The effect of pH variation at the ammonium/ammonia equilibrium in wastewater and its toxicity to *Lemna gibba*. *Aquat. Bot.* **71**, 71–78.
- Kurihara, H., Kato, S. and Ishimatsu, A. (2007). Effects of increased seawater P<sub>CO2</sub> on early development of the oyster *Crassostrea gigas*. *Aquat. Biol.* **1**, 91–98.
- Langenbuch, M. and Pörtner, H.-O. (2002). Changes in metabolic rate and N excretion in the marine invertebrate *Sipunculus nudus* under conditions of environmental hypercapnia: identifying effective acid-base variables. *J. Exp. Biol.* **205**, 1153–1160.
- Lannig, G., Eilers, S., Pörtner, H.-O., Sokolova, I. M. and Bock, C. (2010). Impact of ocean acidification on energy metabolism of oyster, *Crassostrea gigas* – changes in metabolic pathways and thermal response. *Mar. Drugs* **8**, 2318–2339.
- Larsen, B. K., Pörtner, H.-O. and Jensen, F. B. (1997). Extra- and intracellular acid-base balance and ionic regulation in cod (*Gadus morhua*) during combined and isolated exposures to hypercapnia and copper. *Mar. Biol.* **128**, 337–346.

- Lewis, E. and Wallace, D. W. R. (1998). *Program Developed for CO<sub>2</sub> System Calculations ORNL/CDIAC-105*. Oak Ridge, TN: Oak Ridge National Laboratory.
- Loo, L. O., Jonson, P. R., Sköld, M. and Karlsson, O. (1996). Passive suspension feeding in *Amphiura filiformis* (Echinodermata: Ophiuroidea): feeding behaviour in flume flow and potential feeding rate of field populations. *Mar. Ecol. Prog. Ser.* **139**, 143-155.
- Marinelli, R. L. (1994). Effects of burrow ventilation on activities of terebellid polychaete and silicate removal from sediment pore waters. *Limnol. Oceanogr.* **39**, 303-317.
- McElhany, P. and Busch, D. S. (2013). Appropriate  $P_{CO_2}$  treatments in ocean acidification experiments. *Mar. Biol.* **160**, 1807-1812.
- Mehrbach, C., Culberso, C., Hawley, J. and Pytkowic, R. (1973). Measurement of apparent dissociation constants of carbonic acid in seawater at atmospheric pressure. *Limnol. Oceanogr.* **18**, 897-907.
- Melzner, F., Gutowska, M. A., Langenbuch, M., Dupont, S., Lucassen, M., Thorndyke, M. C., Bleich, M. and Pörtner, H. O. (2009). Physiological basis for high CO<sub>2</sub> tolerance in marine ectothermic animals: pre-adaptation through lifestyle and ontogeny? *Biogeosciences* **6**, 2313-2331.
- Melzner, F., Thomsen, J., Koeve, W., Oschlies, A., Gutowska, M. A., Bange, H. W., Hansen, H. P. and Körtzinger, A. (2012). Future ocean acidification will be amplified by hypoxia in coastal habitats. *Mar. Biol.* **160**, 1875-1888.
- Michaelidis, B., Spring, A. and Pörtner, H. O. (2005). Effects of long-term moderate hypercapnia on acid-base balance and growth rate in marine mussels *Mytilus galloprovincialis*. *Mar. Ecol. Prog. Ser.* **293**, 109-118.
- Nawata, C. M., Hirose, S., Nakada, T., Wood, C. M. and Kato, A. (2010). Rh glycoprotein expression is modulated in pufferfish (*Takifugu rubripes*) during high environmental ammonia exposure. *J. Exp. Biol.* **213**, 3150-3160.
- Nilsson, H. C. (1999). Effect of hypoxia and organic enrichment on growth of the brittlestars *Amphiura filiformis* (O. F. Müller) and *Amphiura chiajei* (Forbes). *J. Exp. Mar. Biol. Ecol.* **237**, 11-30.
- Ockelmann, K. W. (1978). The biology, ecology, and behaviour of the bivalve *Myssella bidentata* (Montagu). *Ophelia* **17**, 1-93.
- Otero-Villanueva, M. M., Kelly, M. S. and Burnell, G. (2004). How diet influences energy partitioning in the regular echinoid *Psammechinus miliaris*; conducting an energy budget. *J. Exp. Mar. Biol. Ecol.* **304**, 159-181.
- Pane, E. F. and Barry, J. P. (2007). Extracellular acid-base regulation during short-term hypercapnia is effective in a shallow-water crab, but ineffective in a deep-sea crab. *Mar. Ecol. Prog. Ser.* **334**, 1-9.
- Pomory, F. M. and Lawrence, J. M. (1999). Effect of arm regeneration on energy storage and gonad production in *Ophiocoma echinata* (Echinodermata: Ophiuroidea). *Mar. Biol.* **135**, 57-63.
- Pörtner, H., Reipschläger, A. and Heisler, N., (1998). Acid-base regulation, metabolism and energetics in sipunculus nudus as a function of ambient carbon dioxide level. *J. Exp. Biol.* **201**, 43-55.
- Pörtner, H. O., Bock, C. and Reipschläger, A. (2000). Modulation of the cost of pH regulation during metabolic depression: a <sup>31</sup>P-NMR study in invertebrate (*Sipunculus nudus*) isolated muscle. *J. Exp. Biol.* **203**, 2417-2428.
- Pörtner, H. O., Langenbuch, M. and Reipschläger, A. (2004). Biological impact of elevated ocean CO<sub>2</sub> concentrations: lessons from animal physiology and earth history. *J. Oceanogr.* **60**, 705-718.
- Ramnanan, C. J. and Storey, K. B. (2006). Suppression of Na<sup>+</sup>/K<sup>+</sup>-ATPase activity during estivation in the land snail *Otala lactea*. *J. Exp. Biol.* **209**, 677-688.
- Reipschläger, A. and Pörtner, H. O. (1996). Metabolic depression during environmental stress: the role of extra- versus intracellular pH in *Sipunculus nudus*. *J. Exp. Biol.* **199**, 1801-1807.
- Reipschläger, A., Nilsson, G. E. and Pörtner, H. O. (1997). A role for adenosine in metabolic depression in the marine invertebrate *Sipunculus nudus*. *Am. J. Physiol.* **272**, R350-R356.
- Rosenberg, R., Hellman, B. and Johansson, B. (1991). Hypoxia tolerance in marine benthic fauna. *Mar. Ecol. Prog. Ser.* **79**, 127-131.
- Rosenberg, R., Nilsson, H. C., Hollertz, K. and Hellman, B. (1997). Density-dependent migration in an *Amphiura filiformis* (Amphouridae, Echinodermata) infaunal population. *Mar. Ecol. Prog. Ser.* **159**, 121-131.
- Sarazin, G., Michard, G. and Prevot, F. (1999). A rapid and accurate spectroscopic method for alkalinity measurements in seawater samples. *Water Res.* **33**, 290-294.
- Shih, T. H., Horng, J. L., Hwang, P. P. and Lin, L. Y. (2008). Ammonia excretion by the skin of zebrafish (*Danio rerio*) larvae. *Am. J. Physiol.* **295**, C1625-C1632.
- Stamhuis, E. J. and Videler, J. J. (1998). Burrow ventilation in the tube-dwelling shrimp *Callinassa subterranea* (Decapoda: thalassinidea). II. The flow in the vicinity of the shrimp and the energetic advantages of a laminar non-pulsating ventilation current. *J. Exp. Biol.* **201**, 2159-2170.
- Stumpp, M., Dupont, S., Thorndyke, M. C. and Melzner, F. (2011a). CO<sub>2</sub> induced seawater acidification impacts sea urchin larval development II: gene expression patterns in pluteus larvae. *Comp. Biochem. Physiol.* **160A**, 320-330.
- Stumpp, M., Wren, J., Melzner, F., Thorndyke, M. C. and Dupont, S. T. (2011b). CO<sub>2</sub> induced seawater acidification impacts sea urchin larval development I: elevated metabolic rates decrease scope for growth and induce developmental delay. *Comp. Biochem. Physiol.* **160A**, 331-340.
- Stumpp, M., Trübenbach, K., Brennecke, D., Hu, M. Y. and Melzner, F. (2012). Resource allocation and extracellular acid-base status in the sea urchin *Strongylocentrotus droebachiensis* in response to CO<sub>2</sub> induced seawater acidification. *Aquat. Toxicol.* **110-111**, 194-207.
- Talbot, T. D. and Lawrence, J. M. (2002). The effects of salinity on respiration, excretion, regeneration and production in *Ophiophragmus filigraneus* (Echinodermata: Ophiuroidea). *J. Exp. Mar. Biol. Ecol.* **275**, 1-14.
- Thomsen, J. and Melzner, F. (2010). Moderate seawater acidification does not elicit long-term metabolic depression in the blue mussel *Mytilus edulis*. *Mar. Biol.* **157**, 2667-2676.
- Thorndyke, M. C., Patrino, M. and Beesley, P. W. (2001). Cellular and molecular bases of arm regeneration in brittlestars. In *Echinoderms 2000* (ed. M. Barker). Lisse, The Netherlands: Swets & Zeitlinger.
- Tseng, Y.-C., Hu, M. Y., Stumpp, M., Lin, L. Y., Melzner, F. and Hwang, P. P. (2013). CO<sub>2</sub>-driven seawater acidification differentially affects development and molecular plasticity along life history of fish (*Oryzias latipes*). *Comp. Biochem. Physiol.* **165A**, 119-130.
- Vopel, K., Thistle, D. and Rosenberg, R. (2003). Effect of the brittle star *Amphiura filiformis* (Amphiridae, Echinodermata) on oxygen flux into the sediment. *Limnol. Oceanogr.* **48**, 2034-2045v.
- Walther, K., Anger, K. and Pörtner, H. O. (2010). Effects of ocean acidification and warming on the larval development of the spider crab *Hyas araneus* from different latitudes (54° vs. 79°N). *Mar. Ecol. Prog. Ser.* **417**, 159-170.
- Wehrauch, D., Wilkie, M. P. and Walsh, P. J. (2009). Ammonia and urea transporters in gills of fish and aquatic crustaceans. *J. Exp. Biol.* **212**, 1716-1730.
- Wood, H. L., Spicer, J. I. and Widdicombe, S. (2008). Ocean acidification may increase calcification rates, but at a cost. *Proc. Biol. Sci.* **275**, 1767-1773.
- Wood, H. L., Widdicombe, S. and Spicer, J. I. (2009). The influence of hypercapnia and the infaunal brittlestar *Amphiura filiformis* on sediment nutrient flux-will ocean acidification affect nutrient exchange? *Biogeosciences* **6**, 2015-2024.
- Wood, H. L., Spicer, J. I., Kendall, M. A., Lowe, D. M. and Widdicombe, S. (2011). Ocean warming and acidification; implications for the Arctic brittlestar *Ophiocoma sericeum*. *Polar Biol.* **34**, 1033-1044.
- Woodley, J. D. (1975). The behaviour of some amphirid brittlestars. *J. Exp. Mar. Biol. Ecol.* **18**, 29-46.
- Wu, S.-C., Horng, J.-L., Liu, S.-T., Hwang, P. P., Wen, Z.-H., Lin, C.-S. and Lin, L. Y. (2010). Ammonium-dependent sodium uptake in mitochondrion-rich cells of medaka (*Oryzias latipes*) larvae. *Am. J. Physiol.* **298**, C237-C250.
- Zhu, Q., Aller, R. C. and Fan, Y. (2006). Two-dimensional pH distributions and dynamics in bioturbated marine sediments. *Geochim. Cosmochim. Acta* **70**, 4933-4949.
